# Supplementary material for: Mechanical heterogeneity along single cell-cell junctions is driven by lateral clustering of cadherins during vertebrate axis elongation
Source: eLife journal article supplement (doi:10.7554/elife.65390), 2021-05-25
Supplement: supp [file elife-65390-supp-v1.zip]

Archive with 9 entries (9 files):
- elife_poa_e65390_Figure_1_figure_supplement_1.pdf
- elife_poa_e65390_Figure_1_figure_supplement_2.pdf
- elife_poa_e65390_Figure_1_figure_supplement_3.pdf
- elife_poa_e65390_Figure_2_figure_supplement_1.pdf
- elife_poa_e65390_Figure_4_figure_supplement_1.pdf
- elife_poa_e65390_Figure_4_figure_supplement_2.pdf
- elife_poa_e65390_Figure_5_figure_supplement_1.pdf
- elife_poa_e65390_Figure_7_figure_supplement_1.pdf
- elife_poa_e65390_Transparent_Reporting_File.pdf
