# Supplementary figures and images for: Mechanical heterogeneity along single cell-cell junctions is driven by lateral clustering of cadherins during vertebrate axis elongation
Source: eLife journal article supplement (doi:10.7554/elife.65390), 2021-05-25

Supplemental figure 7

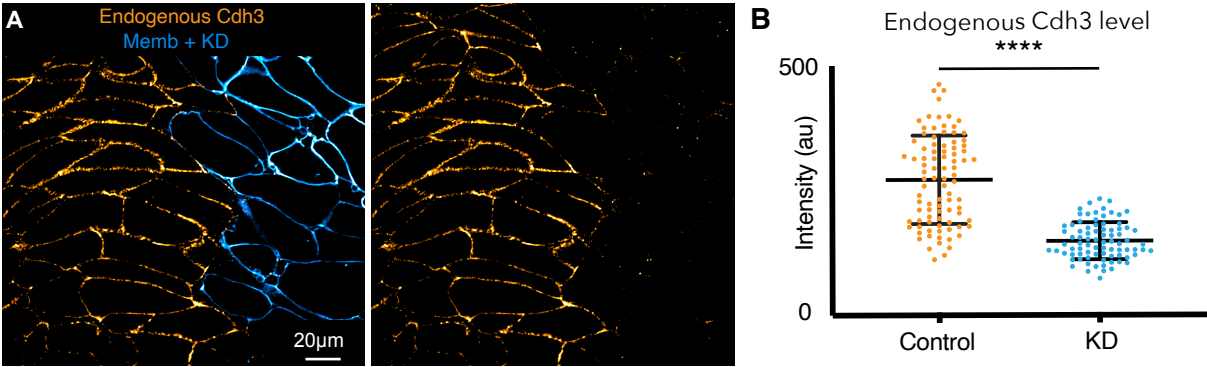

Supplement: supp [file elife-65390-supp-v1.zip]

Supplemental figure 5

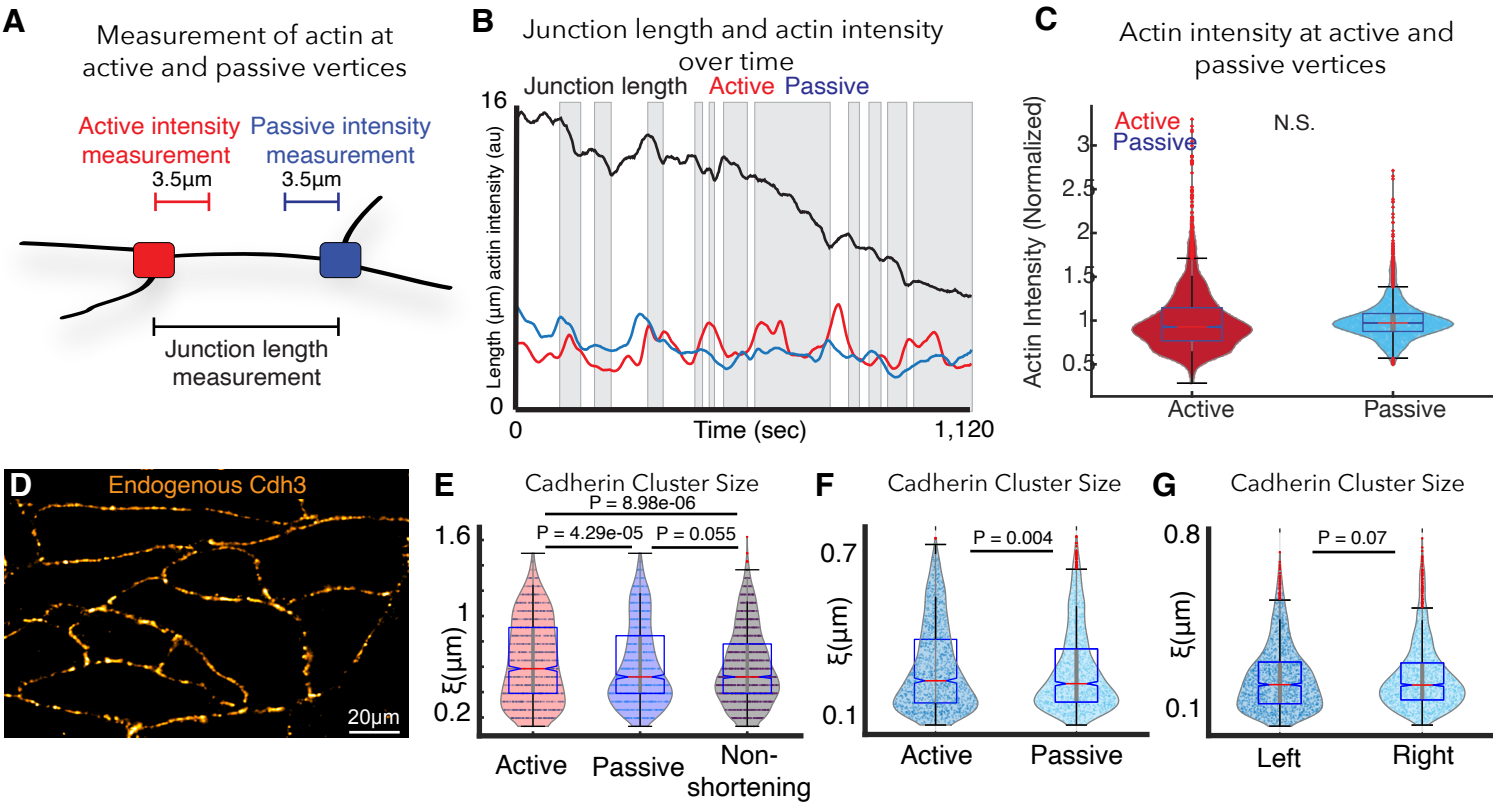

Supplement: supp [file elife-65390-supp-v1.zip]

Supplemental figure 4

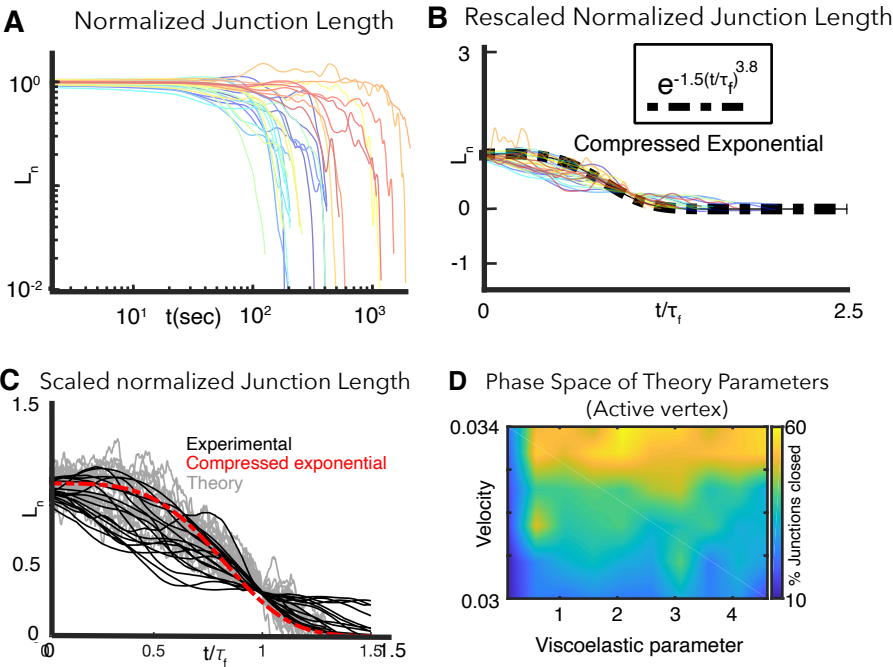

Supplement: supp [file elife-65390-supp-v1.zip]

Supplemental figure 1

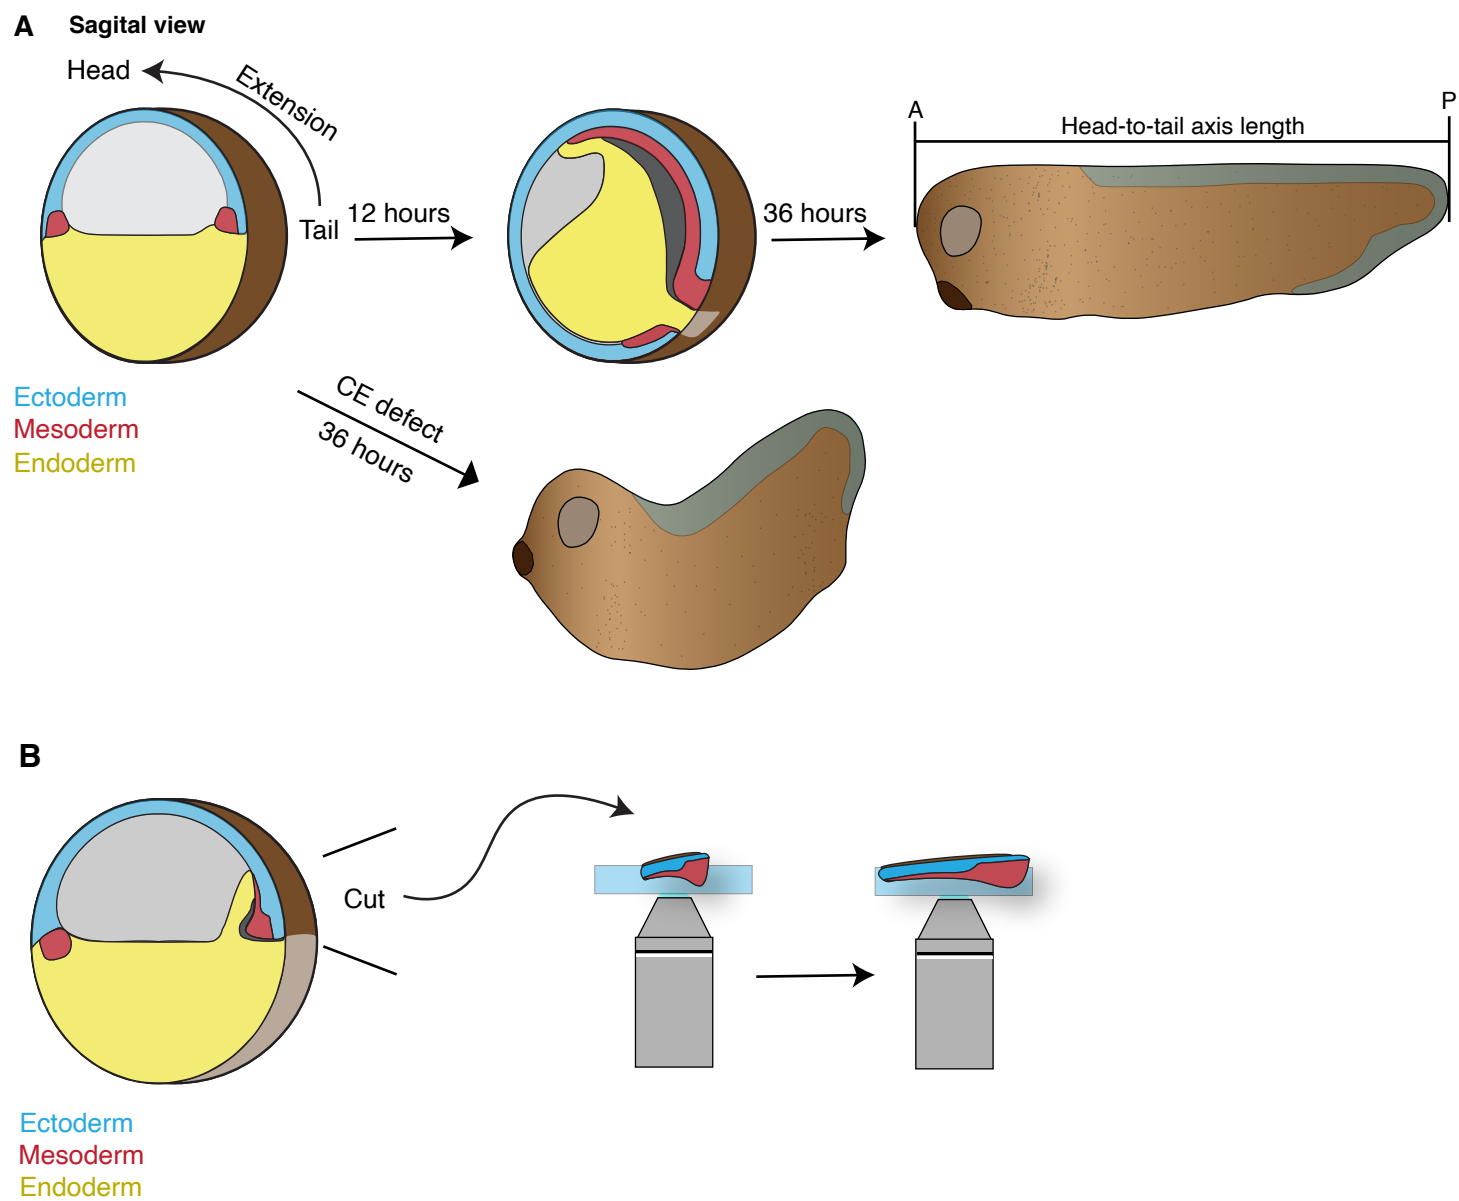

Supplement: supp [file elife-65390-supp-v1.zip › elife_poa_e65390_Figure_1_figure_supplement_1.pdf]

## Supplemental figure 2

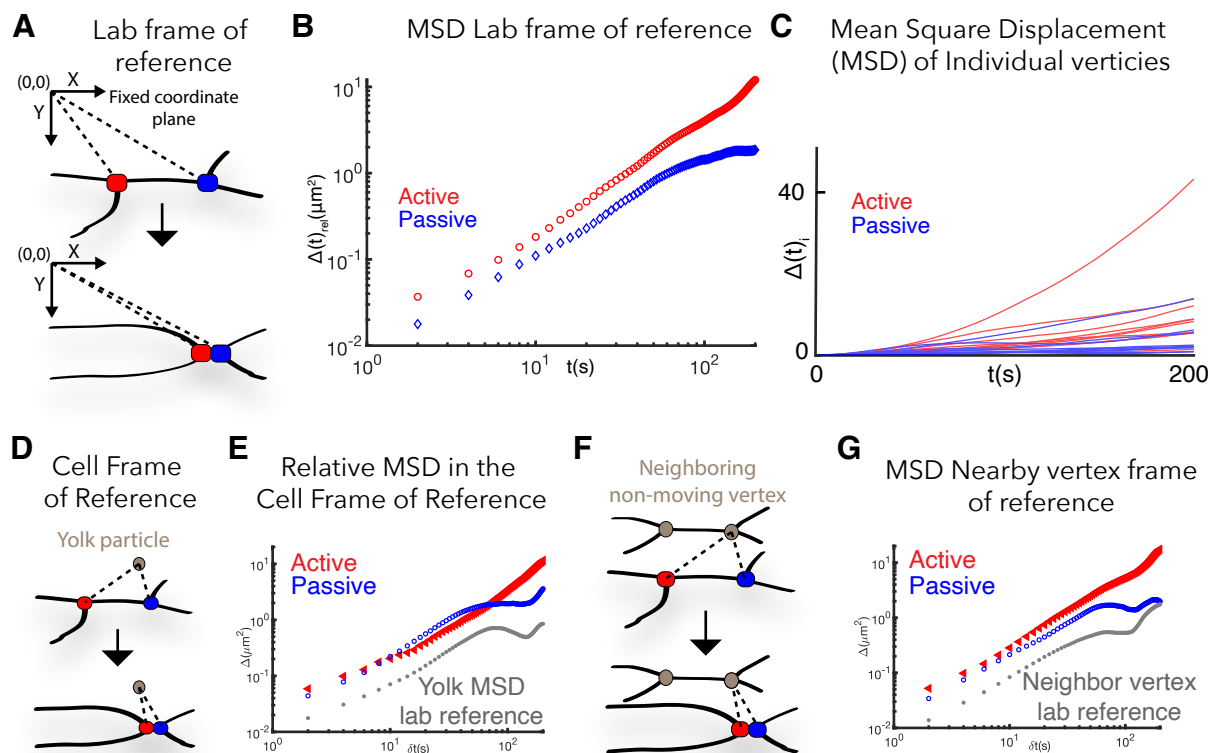

Supplement: supp [file elife-65390-supp-v1.zip › elife_poa_e65390_Figure_1_figure_supplement_2.pdf]

# Supplemental figure 3

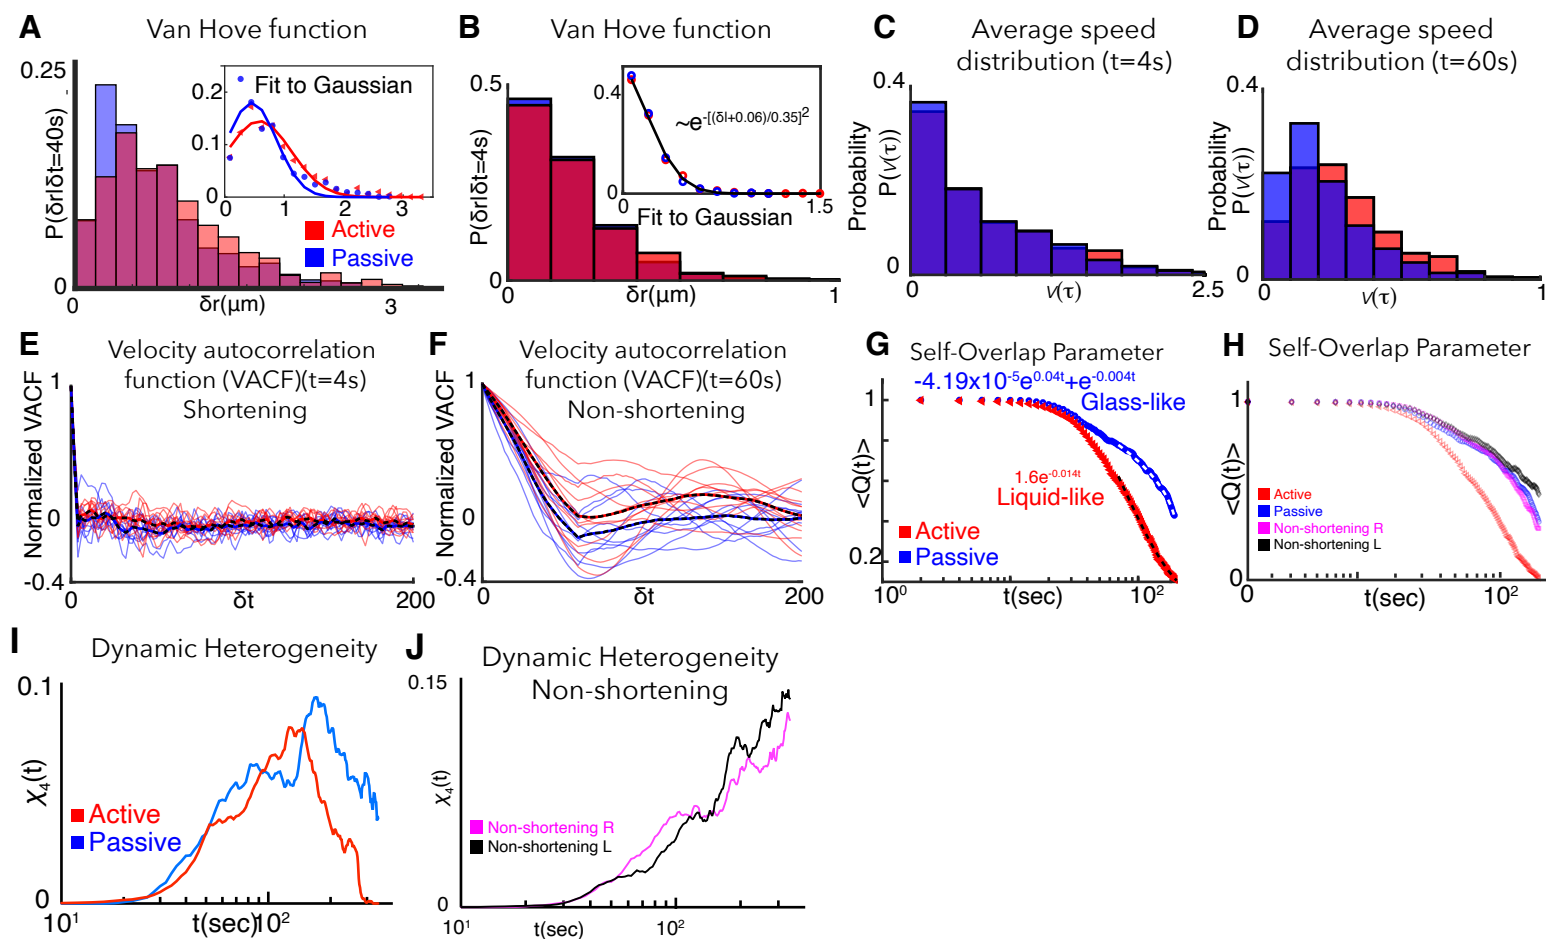

Supplement: supp [file elife-65390-supp-v1.zip › elife_poa_e65390_Figure_1_figure_supplement_3.pdf]

## Supplemental figure 6

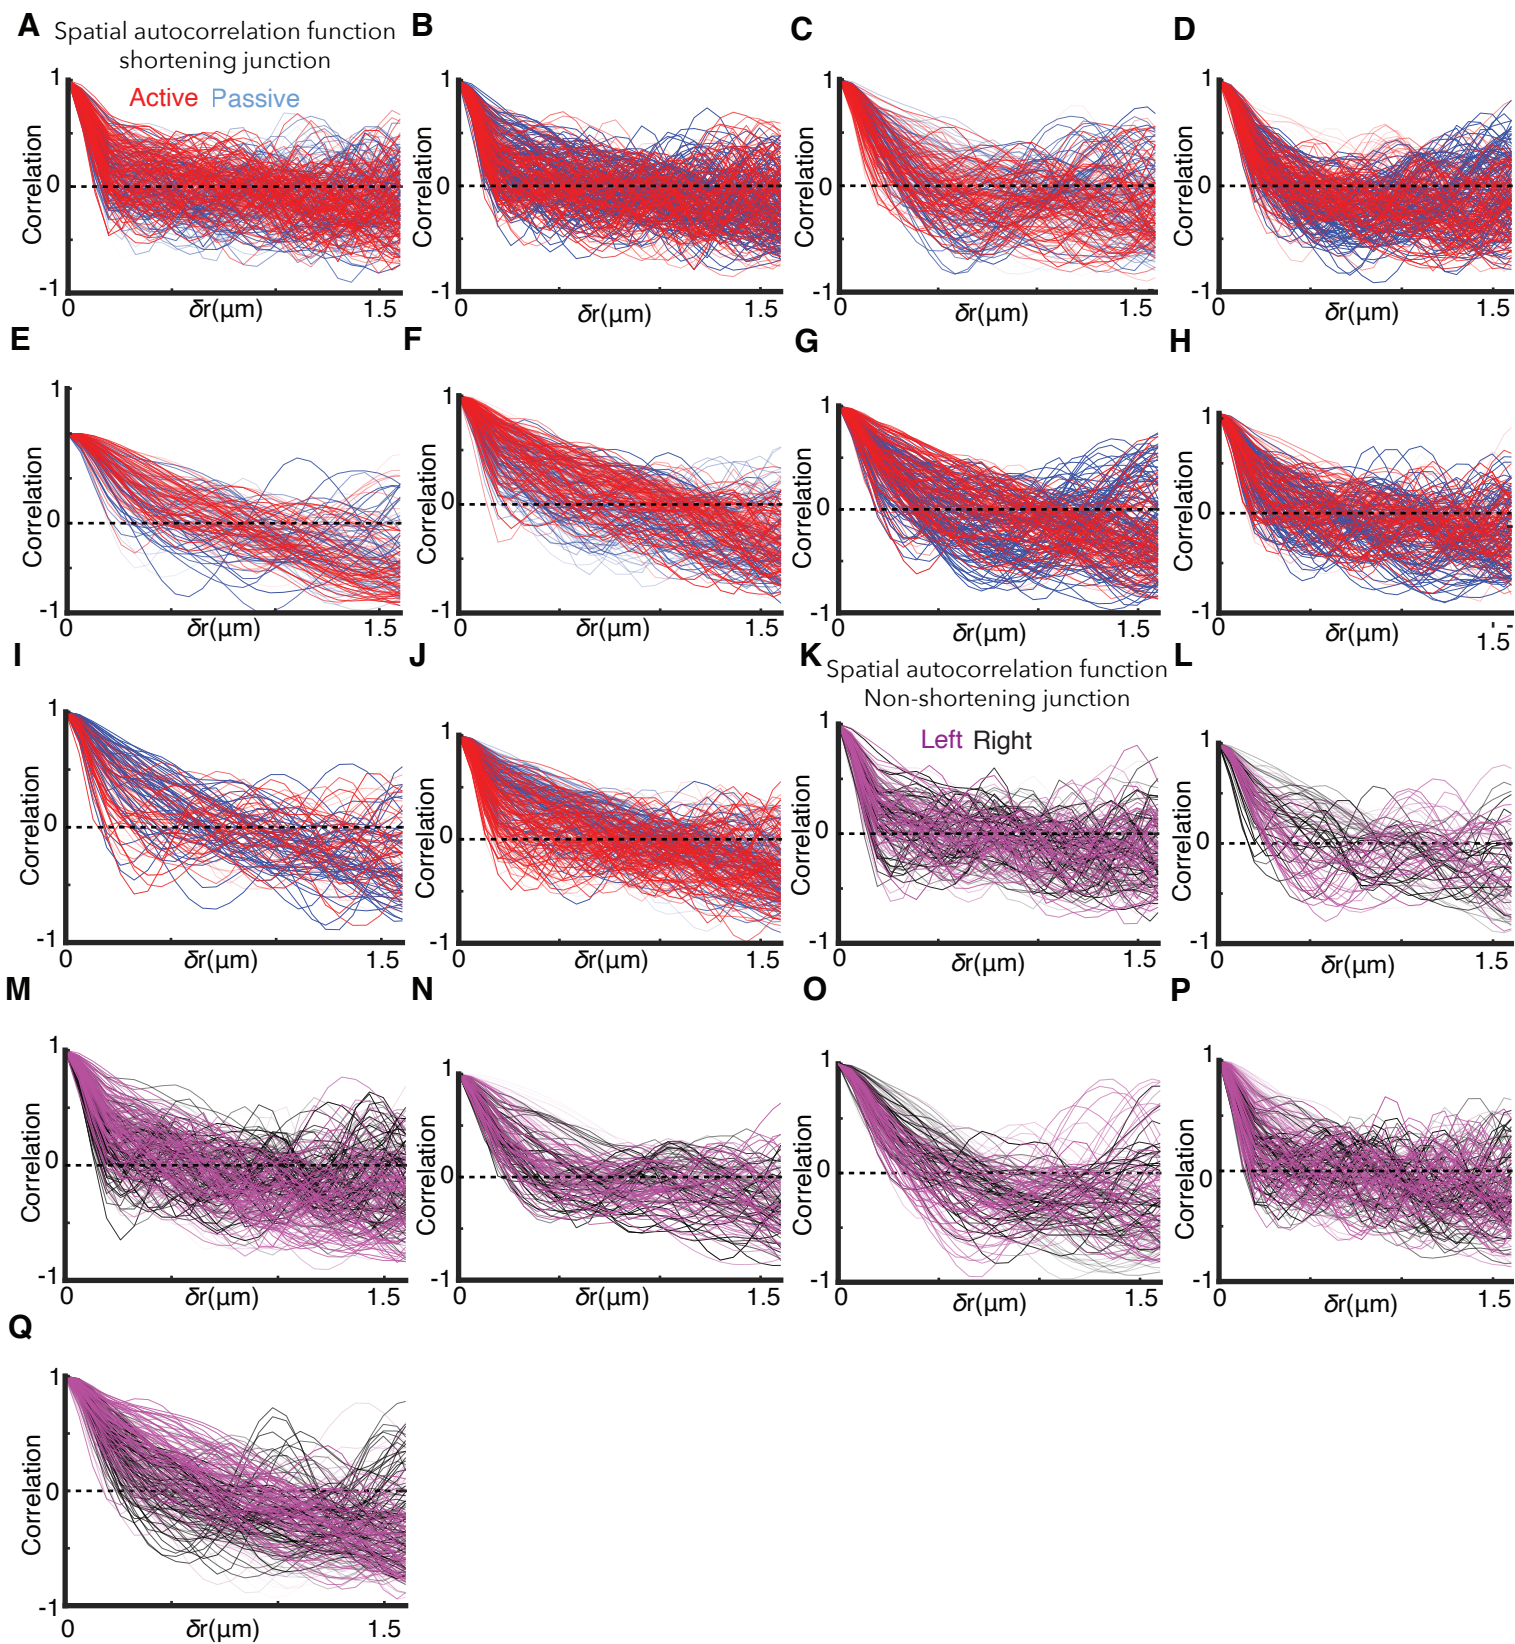

Supplement: supp [file elife-65390-supp-v1.zip › elife_poa_e65390_Figure_4_figure_supplement_2.pdf]

Supplemental figure 8

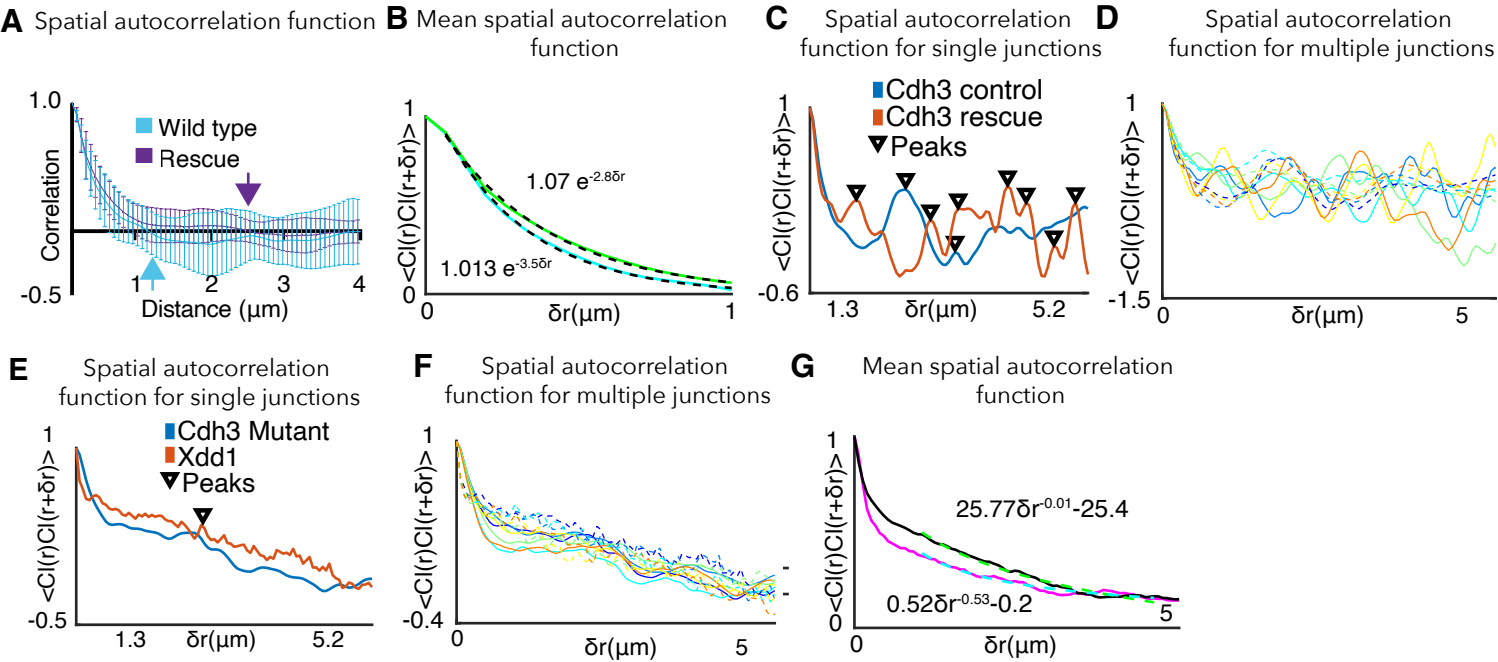

Supplement: supp [file elife-65390-supp-v1.zip › elife_poa_e65390_Figure_7_figure_supplement_1.pdf]
